# Supplementary material for: Temporal Patterns of Diversification across Global Cichlid Biodiversity (Acanthomorpha: Cichlidae)
Source: PubMed Central journal article supplement (PMC3747193; doi:10.1371/journal.pone.0071162), 2013-08-19
Supplement: pone.0071162.s001.pdf [file pone.0071162.s001.pdf]

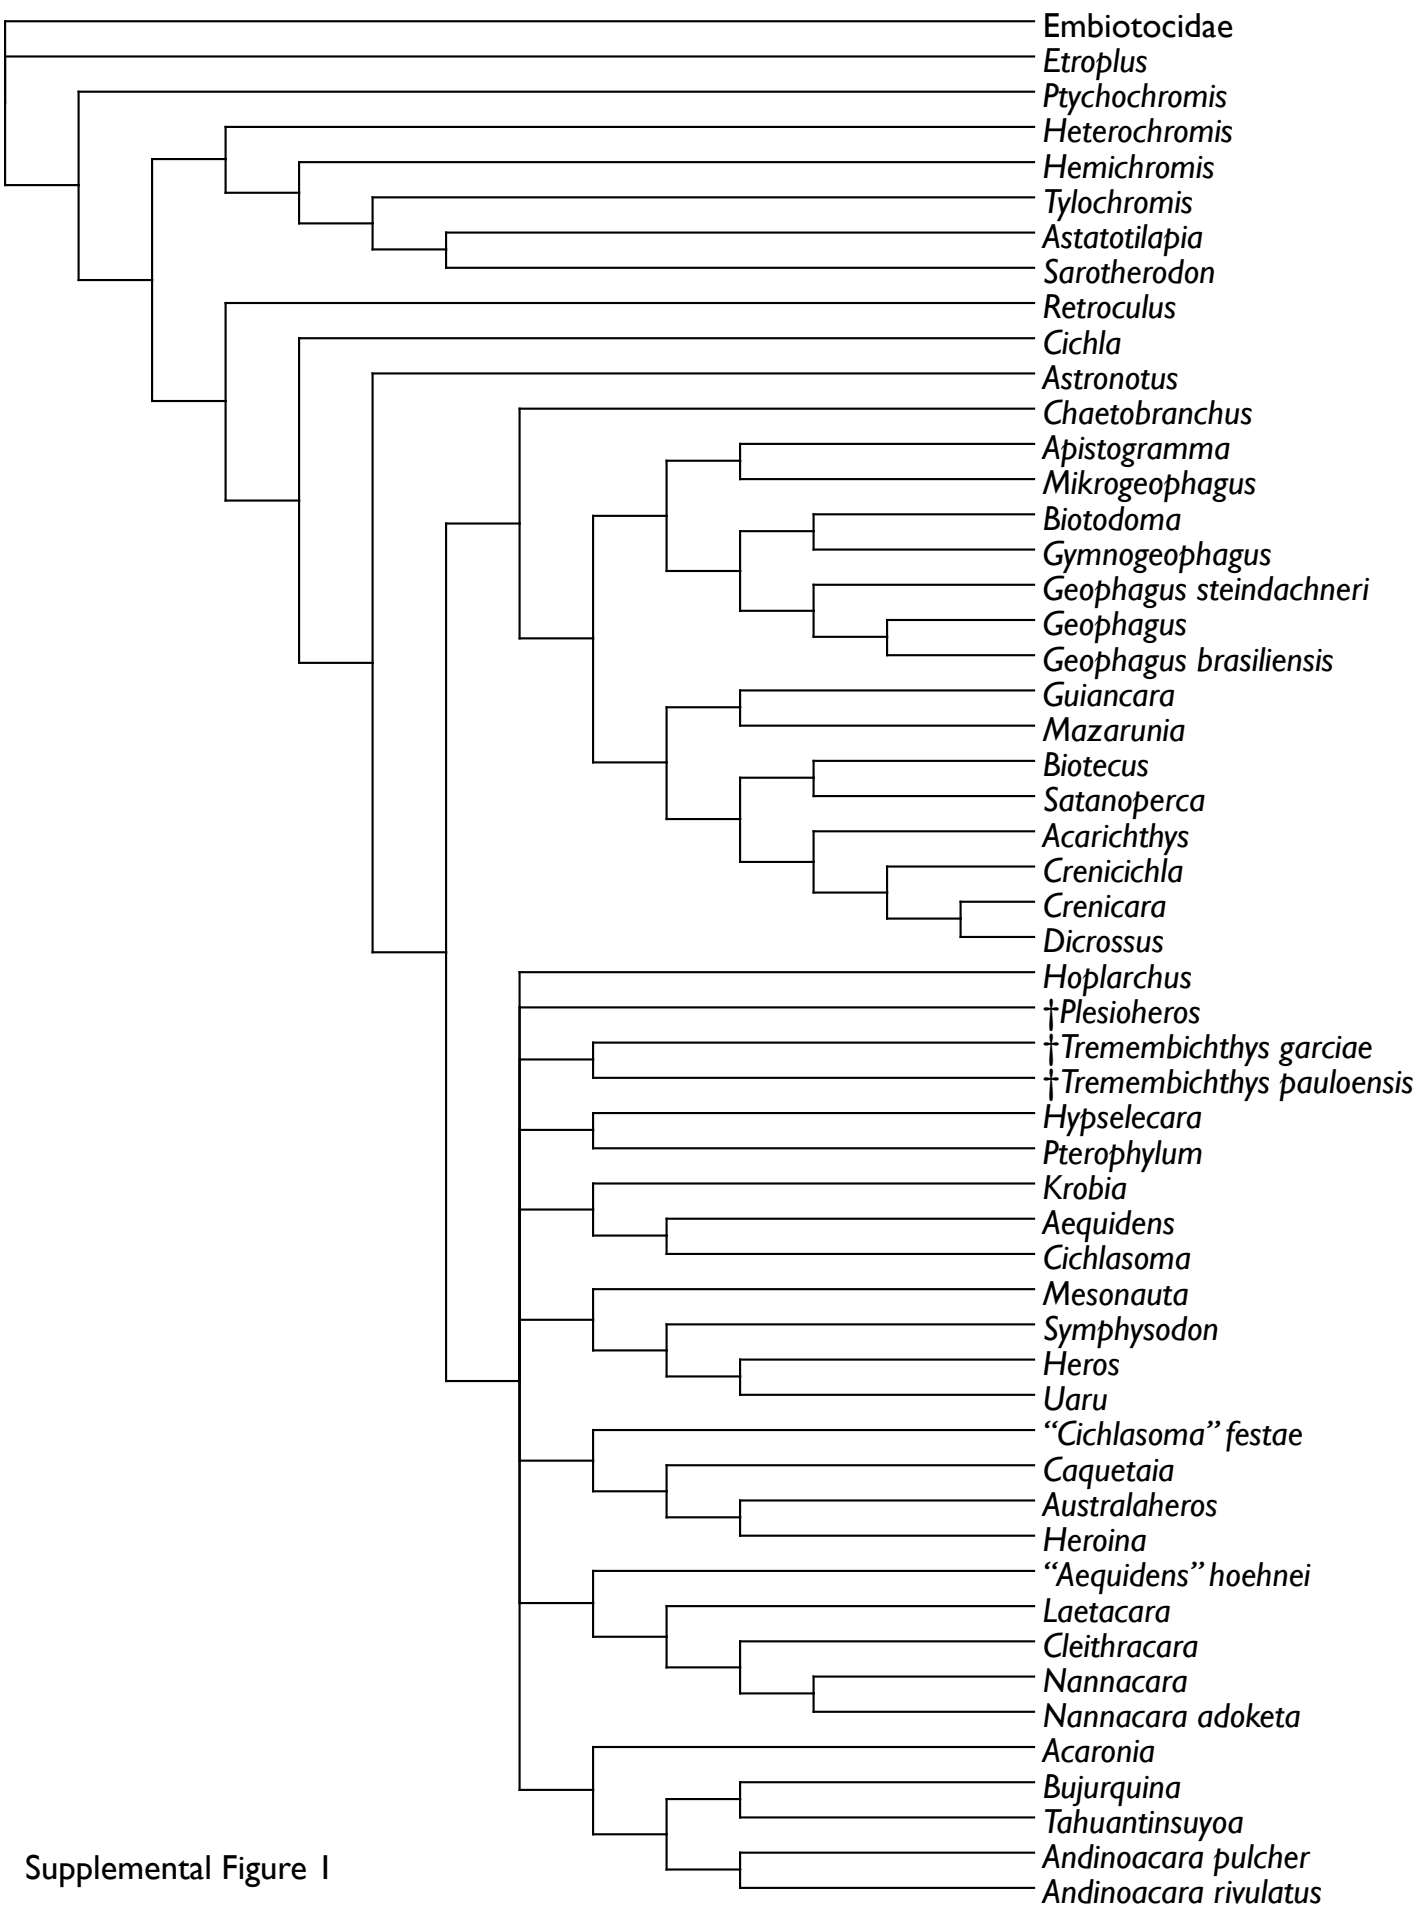

Supplemental Figure I
