# Supplementary material for: Temporal Patterns of Diversification across Global Cichlid Biodiversity (Acanthomorpha: Cichlidae)
Source: PubMed Central journal article supplement (PMC3747193; doi:10.1371/journal.pone.0071162), 2013-08-19
Supplement: pone.0071162.s003.pdf [file pone.0071162.s003.pdf]

Supplemental Table I: Taxa sampled for the phylogenetic analysis and corresponding GenBank accession numbers.

| Terminal Analyzed                             | I6S      | COI      | 4C4      | H3       |
|-----------------------------------------------|----------|----------|----------|----------|
| <i>Polymixia lowei</i>                        | AY538966 | AY662744 | AY539382 | AY539175 |
| <i>Hoplostethus mediterraneus</i>             | AY538968 | AY662745 | AY539384 | AY539177 |
| <i>Abudefduf saxatilis</i>                    | AF285942 | AY662765 | AY662815 | N/A      |
| <i>Amblyphidodon leucogaster</i>              | N/A      | AY662764 | AY662813 | N/A      |
| <i>Amphiprion polymnus</i>                    | AY666170 | N/A      | AY662814 | AY662889 |
| <i>Badis badis</i>                            | AY662699 | AY662746 | AY662799 | AY662875 |
| <i>Calamus penna</i>                          | AY662700 | AY662747 | AY662800 | AY662876 |
| <i>Callopleysiops altivelis</i>               | AY662701 | AY662748 | AY662801 | AY662877 |
| <i>Cetoscarus bicolor</i>                     | AY662707 | AY662758 | AY662807 | AY662883 |
| <i>Ctenopoma acutiostre</i>                   | AY662702 | AY662749 | AY662802 | AY662878 |
| <i>Cymatogaster aggregata</i>                 | AY662711 | AY662762 | AY662811 | AY662887 |
| <i>Diplectrum formosum</i>                    | AY539048 | AY662750 | AY539456 | AY539257 |
| <i>Embiotoca jacksoni</i>                     | AY662712 | AY662763 | AY662812 | AY662888 |
| <i>Gramma loreto</i>                          | AY539053 | AY662751 | AY539461 | AY539268 |
| <i>Haemulon plumieri</i>                      | AY539057 | AY662752 | A539465  | AY539266 |
| <i>Haletta semifasciata</i>                   | AY662708 | AY662759 | AY662808 | AY662884 |
| <i>Hermosilla azurea</i>                      | AY662703 | N/A      | AY662803 | AY662879 |
| <i>Lachnolaimus maximus</i>                   | AY662709 | AY662760 | AY662809 | AY662885 |
| <i>Micrometrus minimus</i>                    | EU888021 | N/A      | U70346   | EU888022 |
| <i>Monocirrhus polyacanthus</i>               | A662704  | AY662753 | AY662804 | AY662880 |
| <i>Morone saxatilis</i>                       | AY538941 | AY662754 | AY539454 | AY539255 |
| <i>Perca flavescens</i>                       | AY539055 | AY662755 | AY539463 | AY539264 |
| <i>Polycentropsis abbreviata</i>              | AY662705 | AY662756 | AY662805 | AY662881 |
| <i>Pristolepis fasciata</i>                   | AY662706 | AY662757 | AY662806 | AY662882 |
| <i>Tautoga onitis</i>                         | AY662710 | AY662761 | AY662810 | AY662886 |
| <b>Family Cichlidae</b>                       |          |          |          |          |
| <b>Subfamily Etoplinae</b>                    |          |          |          |          |
| <i>Etoplus canarensis</i>                     | AY662713 | AY662766 | AY662816 | AY662890 |
| <i>Etoplus maculatus</i>                      | AY263830 | AY263858 | AY662818 | AY662892 |
| <i>Etoplus suratensis</i>                     | AY263829 | AY263870 | AY662817 | AY662891 |
| <i>Paretroplus dambabe</i>                    | AY263822 | AY263851 | AY662819 | AY662893 |
| <i>Paretroplus damii</i>                      | AY263827 | AY263856 | AY662820 | AY662824 |
| <i>Paretroplus gympropepercularis</i>         | AY263825 | AY263855 | AY662822 | AY662897 |
| <i>Paretroplus kieneri</i> (Kinkony)          | AY263827 | AY263854 | AY662821 | AY662895 |
| <i>Paretroplus kieneri</i> (Betsiboka)        | AY662715 | AY662768 | AY662823 | AY662898 |
| <i>Paretroplus lamnabe</i>                    | AY662717 | AY662770 | AY662830 | AY662905 |
| <i>Paretroplus maculatus</i>                  | AY263820 | AY263872 | AY662824 | AY662899 |
| <i>Paretroplus maromandia</i>                 | AY263821 | AY263852 | AY662825 | AY662900 |
| <i>Paretroplus menarambo</i>                  | AY263823 | AY263853 | AY662826 | AY662901 |
| <i>Paretroplus nourissati</i>                 | AY263828 | AY263857 | AY662827 | AY662902 |
| <i>Paretroplus polyactis</i>                  | AY263826 | AY263871 | AY662828 | AY662903 |
| <i>Paretroplus cf. polyactis</i>              | AY662718 | AY662771 | AY662831 | AY662906 |
| <i>Paretroplus tsimoly</i>                    | AY662716 | AY662769 | AY662829 | AY662904 |
| <b>Subfamily Ptychochrominae</b>              |          |          |          |          |
| <i>Katria katria</i>                          | AY263814 | AY263880 | AY662840 | AY662915 |
| <i>Oxylapia polli</i>                         | AY263817 | AY263881 | AY662832 | AY662907 |
| <i>Paratilapia cf. bleekeri</i>               | AY263819 | AY263885 | AY662833 | AY662908 |
| <i>Paratilapia polleni</i>                    | AY662720 | AY662772 | AY662835 | AY662910 |
| <i>Paratilapia sp.</i> (East)                 | AY263818 | AY263884 | AY662836 | AY662911 |
| <i>Paratilapia sp.</i> (Nosy Be)              | AY662719 | AY263886 | AY662834 | AY662909 |
| <i>Paratilapia sp.</i> (lfasy)                | AY662721 | AY662773 | AY662837 | AY662912 |
| <i>Ptychochromis grandidieri</i>              | AY263811 | AY263878 | AY662841 | AY662916 |
| <i>Ptychochromis inornatus</i>                | AY263812 | AY263875 | AY662842 | AY662917 |
| <i>Ptychochromis insolitus</i>                | AY662725 | AY662777 | AY662847 | AY662922 |
| <i>Ptychochromis oligacanthus</i> (Nosy Be)   | AY263813 | AY263873 | AY662843 | AY662918 |
| <i>Ptychochromis oligacanthus</i> (Northwest) | AY662722 | AY662774 | AY662844 | AY662919 |
| <i>Ptychochromis makira</i>                   | AY662724 | AY662775 | AY662846 | AY662922 |
| <i>Ptychochromis loisellei</i>                | AY662723 | AY662776 | AY662845 | AY662920 |
| <i>Ptychochromoides betsileanus</i>           | AY263815 | AY263882 | AY662838 | AY662913 |
| <i>Ptychochromoides vondrozo</i>              | AY263816 | AY263883 | AY662839 | AY662914 |
| <b>Subfamily Pseudocrenilabrinae</b>          |          |          |          |          |
| <i>Heterochromis multidentis</i>              | AF048996 | EU888027 | AF113060 | EU888028 |
| <i>Astatoreochromis alluaudi</i>              | AY263846 | AY662788 | AY662859 | AY662938 |
| <i>Chalinochromis popelini</i>                | AY263844 | AY263867 | AY662860 | AY662939 |
| <i>Diplotaxodon sp.</i>                       | AY263843 | AY263866 | AY662861 | AY662940 |
| <i>Etia nguiti</i>                            | AY662736 | AY662789 | AY662862 | AY662941 |
| <i>Gobiocichlaethelwynnae</i>                 | AY662737 | AY662790 | AY662863 | AY662942 |
| <i>Haplochromis burtoni</i>                   | EU888023 | EU888024 | EU888025 | EU888026 |
| <i>Haplochromis simpsoni</i>                  | AY263848 | AY662791 | AY662864 | AY662943 |
| <i>Haplochromis sp.</i> (Silver bullet)       | AY263847 | AY662892 | AY662865 | AY662944 |
| <i>Hemichromis guttatus</i>                   | AY662738 | AY662793 | AY662866 | AY662945 |
| <i>Neolamprologus brichardi</i>               | AY263845 | AY662794 | AY662867 | AY662946 |
| <i>Oreochromis esculentus</i>                 | AY662739 | AY662795 | AY662868 | AY662947 |
| <i>Oreochromis mossambicus</i>                | AY263841 | AY263864 | AY662869 | AY662948 |
| <i>Pelmatochromis nigrofasciatus</i>          | AY662740 | N/A      | AY662870 | AY662949 |
| <i>Pelviachromis pulcher</i>                  | AY662741 | AY662796 | A662871  | AY662950 |
| <i>Pseudotropheus zebra</i>                   | AY263842 | AY263865 | AY662872 | AY662951 |
| <i>Sarotherodon lohbergeri</i>                | EU888029 | EU888030 | EU888031 | EU888032 |
| <i>Steatocranus tinanti</i>                   | AY662742 | AY662797 | AY662873 | AY662952 |
| <i>Tylochromis pulcher</i>                    | AY662743 | AY662798 | AY662874 | AY662953 |
| <b>Subfamily Cichlinae</b>                    |          |          |          |          |
| <i>Acarichthys heckelii</i>                   | AY662726 | AY662778 | AY662848 | AY662923 |
| <i>Acaronia nassa</i>                         | AY263835 | AY263862 | AY662849 | AY662924 |
| <i>Aequidens pulcher</i>                      | AY294128 | EU888039 | N/A      | EU888040 |
| <i>Aequidens rivulatus</i>                    | EU888041 | EU888042 | N/A      | EU888043 |
| <i>Aequidens tetramerus</i>                   | EU888036 | EU888037 | AF113078 | EU888038 |
| <i>Amatitlania nigrofasciata</i>              | DQ119167 | DQ119196 | DQ119225 | N/A      |
| <i>Amphilophus citrinellus</i>                | DQ119169 | DQ119198 | DQ119227 | N/A      |
| <i>Apistogramma sp.</i>                       | AY662727 | AY662779 | AY662850 | AY662925 |
| <i>Apistogrammoides pucallpaensis</i>         | EU888071 | EU888072 | N/A      | EU888073 |
| <i>Archocentrus centrarchus</i>               | DQ119162 | DQ119163 | DQ119164 | N/A      |
| <i>Astronotus ocellatus</i>                   | AY263832 | AY263859 | AY662851 | AY662926 |
| <i>Australoheros facetus</i>                  | EU888095 | EU888096 | N/A      | EU888097 |
| <i>Biotodoma wavrini</i>                      | EU888074 | EU888075 | EU888076 | EU888077 |
| <i>Biotococcus dicentrarchus</i>              | EU888064 | EU888065 | N/A      | EU888066 |
| <i>Bujurquina vittata</i>                     | DQ119186 | DQ119215 | DQ119244 | EU888044 |
| <i>Caquetaia spectabilis</i>                  | EU888098 | EU888099 | EU888100 | EU888101 |
| <i>Chaetobranchopsis orbicularis</i>          | AY662728 | AY662780 | AY662852 | AY662927 |
| <i>Chaetobranchius flavescens</i>             | EU888033 | EU888034 | AF113080 | EU888035 |
| <i>Cichla temensis</i>                        | AY662729 | AY662781 | AY662853 | AY662928 |
| <i>Cichlasoma bimaculatum</i>                 | AY263836 | AY263863 | AF113075 | AY662929 |
| <i>'Cichlasoma' festae</i>                    | DQ119187 | DQ119216 | DQ119245 | EU888102 |
| <i>Cleithracara maronii</i>                   | EU888045 | EU888046 | N/A      | EU888047 |
| <i>Crenicara punctulatum</i>                  | EU888067 | EU888068 | EU888069 | EU888070 |
| <i>Crenicichla alta</i>                       | AY263837 | AY263860 | AY662854 | AY662930 |
| <i>Dicrossus sp.</i>                          | AY662730 | AY662782 | AY662855 | AY662931 |
| <i>Geophagus brasiliensis</i>                 | EU888080 | EU888081 | EU888082 | EU888083 |
| <i>Geophagus megasema</i>                     | EU888078 | N/A      | AF113093 | EU888079 |
| <i>Geophagus steindachneri</i>                | DQ119188 | DQ119217 | DQ119246 | EU888084 |
| <i>Guianacara sp.</i>                         | EU888061 | EU888062 | AF113084 | EU888063 |
| <i>Gymngeophagus gymnogenys</i>               | EU888085 | EU888086 | EU888087 | EU888088 |
| <i>Herichthys carpinitis</i>                  | DQ119172 | DQ119201 | DQ119230 | N/A      |
| <i>Heros appendiculatus</i>                   | DQ119189 | DQ119218 | DQ119247 | EU888103 |
| <i>Herotilapia multispinosa</i>               | DQ119166 | DQ119195 | DQ119224 | N/A      |
| <i>Hoplarthus psittacus</i>                   | EU888104 | EU888105 | EU888106 | EU888107 |
| <i>Hypselecara temporalis</i>                 | DQ119190 | DQ119219 | DQ119248 | EU888108 |
| <i>Hypsophrys nicaraguensis</i>               | DQ119173 | DQ118202 | DQ119231 | N/A      |
| <i>Krobia sp.</i>                             | EU888048 | EU888049 | N/A      | EU888050 |
| <i>Laetacara thayeri</i>                      | EU888051 | EU888052 | AF113079 | EU888053 |
| <i>Mesonauta festivus</i>                     | EU888109 | EU888110 | AF113066 | EU888111 |
| <i>Mikrogeophagus altispinosus</i>            | EU888089 | EU888090 | AF113089 | EU888091 |
| <i>Nandopsis ramsdeni</i>                     | AY662731 | AY662787 | DQ119182 | AY662932 |
| <i>Nannacara taenia</i>                       | EU888054 | EU888055 | N/A      | EU888056 |
| <i>Parachromis managuensis</i>                | DQ119174 | DQ119203 | DQ119232 | N/A      |
| <i>Paraneotroplus melanurus</i>               | DQ119180 | DQ119209 | DQ119238 | N/A      |
| <i>Petenia splendida</i>                      | DQ119177 | DQ119206 | DQ119235 | N/A      |
| <i>Pterophyllum scalarae</i>                  | AY662732 | AY662783 | AY662856 | AY662933 |
| <i>Retroculus xinguensis</i>                  | AY662733 | AY662784 | AY662857 | AY662934 |
| <i>Rocio octofasciata</i>                     | DQ119168 | DQ119197 | DQ119226 | N/A      |
| <i>Satanoperca leucosticta</i>                | AY263838 | AY263861 | AY662935 | AY662935 |
| <i>Symphysodon discus</i>                     | EU888112 | EU888113 | AF113069 | N/A      |
| <i>Taeniocara candidi</i>                     | EU888092 | EU888093 | AF113094 | EU888094 |
| <i>Tahuantinsuyoa macantatzata</i>            | EU888057 | EU888058 | EU888059 | EU888060 |
| <i>Teleocichla sp.</i>                        | AY662734 | AY662785 | AY662858 | AY662936 |
| <i>Cichlasoma' wesseli</i>                    | EU888114 | EU888115 | N/A      | N/A      |
| <i>Thorichthys aureus</i>                     | DQ119178 | DQ119207 | DQ119236 | N/A      |
| <i>Tomocichla asfraci</i>                     | AY662735 | AY662786 | DQ119237 | AY662937 |
| <i>Uaru amphiacanthoides</i>                  | DQ119191 | DQ119221 | DQ119249 | EU888116 |
