# Supplementary material for: Temporal Patterns of Diversification across Global Cichlid Biodiversity (Acanthomorpha: Cichlidae)
Source: PubMed Central journal article supplement (PMC3747193; doi:10.1371/journal.pone.0071162), 2013-08-19
Supplement: pone.0071162.s004.pdf [file pone.0071162.s004.pdf]

Supplemental Table 2. GenBank numbers of species analyzed for Neotropical cichlid fossil as shown in Supplemental Figures 1-2

| Terminal Analyzed                 | ND4      | Cyt-b    | I6S       | RAG2     | S7       | COI      | 4C4       | H3       | M27      |
|-----------------------------------|----------|----------|-----------|----------|----------|----------|-----------|----------|----------|
| Embiotocidae                      | N/A      | AF159336 | EU888021  | N/A      | N/A      | N/A      | U70346    | EU888022 | U63676   |
| <i>Etroplus</i>                   | N/A      | AF370625 | AY263830  | AY279874 | DQ119250 | AY263858 | AY662892  | AY662818 | U63672   |
| <i>Ptychochromis</i>              | N/A      | AF370630 | AY662722  | AY279873 | N/A      | AY662774 | AY662844  | AY662919 | N/A      |
| <i>Astatotilapia</i>              | N/A      | AF015029 | EU888023  | N/A      | N/A      | EU888024 | EU888025  | EU888026 | U63659   |
| <i>Hemichromis</i>                | GU736996 | AF015017 | AY662738  | N/A      | GU736678 | AY662793 | AY662866  | AY662945 | N/A      |
| <i>Heterochromis</i>              | GU736993 | AF370636 | AF948996  | GU736811 | GU736676 | EU888027 | AF113060  | EU888028 | AF112598 |
| <i>Sarotherodon</i>               | N/A      | AJ844960 | EU888029  | N/A      | N/A      | EU888030 | EU888031  | EU888032 | N/A      |
| <i>Tylochromis</i>                | N/A      | AF370639 | AY662743  | N/A      | N/A      | AY662798 | AY662874  | AY662953 | U63656   |
| <i>Acarichthys</i>                | AY566768 | AF370653 | AY662726  | AY566733 | GU736686 | AY662778 | AY662848  | AY662923 | AF112621 |
| <i>Acaronia</i>                   | GU737029 | AF370666 | AY263835  | GU736845 | EF432989 | AY263862 | AY662849  | AY662924 | AF112614 |
| <i>Aequidens</i> (sensu stricto)  | GU737016 | AY050609 | EU888036  | GU736829 | EF432971 | EU888037 | AF113078  | EU888038 | AF112616 |
| <i>"Aequidens" hoehnei</i>        | N/A      | N/A      | N/A       | N/A      | N/A      | N/A      | N/A       | N/A      | N/A      |
| <i>Andinoacara pulcher</i>        | GU737021 | EF432943 | AY294128  | GU736834 | EF432979 | EU888039 | N/A       | EU888040 | N/A      |
| <i>Andinoacara rivulatus</i>      | GU737020 | EF432935 | EU888041  | GU736833 | EF432977 | EU888042 | N/A       | EU888043 | N/A      |
| <i>Apistogramma</i>               | AY566787 | AF370656 | AY662727  | AY566749 | DQ119272 | AY662779 | AY662850  | AY662925 | AF112633 |
| <i>Astronotus</i>                 | AY566776 | AB018987 | AY263832  | AY566740 | GU736683 | AY263859 | AY662851  | AY662926 | U63668   |
| <i>Australoheros</i>              | GU737032 | AY998666 | EU888095  | GU736848 | GU736752 | EU888096 | N/A       | EU888097 | N/A      |
| <i>Biotodoma</i>                  | AY566784 | AF370657 | EU888074  | AY566726 | GU736693 | EU888075 | EU888076  | EU888077 | AF112620 |
| <i>Biotocetus</i>                 | AY566792 | GU736929 | EU888064  | AY566754 | GU736694 | EU888065 | N/A       | EU888066 | N/A      |
| <i>Bujurquina</i>                 | N/A      | AF370668 | DQ119186  | GU736835 | DQ119273 | DQ119215 | DQ119244  | EU888044 | AF112615 |
| <i>Caquetaia</i>                  | GU737070 | AF370671 | EU888098  | GU736885 | DQ836805 | EU888099 | EU888100  | EU888101 | AF112609 |
| <i>Chaetobranchius</i>            | GU736998 | AF370652 | EU8880333 | GU736812 | GU736684 | EU888034 | AF113080  | EU888035 | AF112618 |
| <i>Cichla</i>                     | AY566793 | AF370644 | AY662729  | AY566755 | GU736680 | AY662781 | AY662853  | AY662928 | U63666   |
| <i>Cichlasoma</i> (sensu stricto) | AY566778 | AF145128 | AY263836  | AY566747 | EF432966 | AY263863 | AF113075  | AY662929 | AF112613 |
| <i>"Cichlasoma" festae</i>        | GU737031 | AY050610 | DQ119187  | GU736847 | DQ836812 | DQ119216 | DQ119245  | EU888044 | N/A      |
| <i>Cleithracara</i>               | GU737024 | AY050614 | EU888045  | GU736839 | EF432993 | EU888046 | N/A       | EU888047 | N/A      |
| <i>Crenicara</i>                  | N/A      | AF370655 | EU888067  | AY566742 | GU736695 | EU888068 | EU888069  | EU888070 | AF112628 |
| <i>Crenicichla</i>                | AY566785 | AF370646 | AY263837  | AY566750 | GU736697 | AY263860 | AY662854  | AY662930 | AF112625 |
| <i>Dicrossus</i>                  | AY566767 | GU736938 | AY662730  | AY566731 | GU736704 | AY662782 | AY662855  | AY662931 | N/A      |
| <i>Geophagus</i> (sensu stricto)  | AY566763 | AF370658 | EU888078  | AY566727 | GU736706 | N/A      | AF113093  | EU888079 | AF112631 |
| <i>Geophagus brasiliensis</i>     | AY566766 | AF370659 | EU888080  | AY566732 | GU736713 | EU888081 | EU888082  | EU888083 | AF112626 |
| <i>Geophagus steindachneri</i>    | AY566765 | AF370660 | DQ119188  | AY566730 | DQ119275 | DQ119217 | DQ119246  | EU888084 | N/A      |
| <i>Guianacara</i>                 | AY566762 | AF370654 | EU888061  | AY566730 | GU736715 | EU888062 | AF113084  | EU888063 | AF112622 |
| <i>Gymnogeophagus</i>             | AY566775 | AF370661 | EU888085  | AY566738 | GU736718 | EU888086 | EU888087  | EU888088 | AF112623 |
| <i>Heroina</i>                    | GU737044 | AY998670 | GU737198  | GU736860 | N/A      | N/A      | N/A       | N/A      | N/A      |
| <i>Heros</i>                      | GU737034 | DQ010102 | DQ119189  | GU736849 | DQ119276 | DQ119218 | DQ119247  | EU888103 | AF112605 |
| <i>Hoplarchus</i>                 | AY566789 | AF370673 | EU888104  | AY566760 | GU736757 | EU888105 | EU888106  | EU888107 | AF112612 |
| <i>Hypselecara</i>                | GU737037 | AY050612 | DQ119190  | GU736853 | DQ119277 | DQ119219 | DQ119248  | EU888108 | AF112611 |
| <i>Krobia</i>                     | GU737025 | EF432931 | EU888048  | GU736840 | EF432961 | EU888049 | N/A       | EU888050 | N/A      |
| <i>Laetacara</i>                  | GU737026 | AY050608 | EU888051  | GU736842 | EF433001 | EU888052 | AF113079  | EU888053 | AF112617 |
| <i>Mazarunia</i>                  | GU737012 | GU736960 | GU737165  | GU736825 | GU736729 | N/A      | N/A       | N/A      | N/A      |
| <i>Mesonauta</i>                  | AY566782 | DQ494392 | EU888109  | AY566748 | DQ836809 | EU888110 | AF113066  | EU888111 | AF112604 |
| <i>Mikrogeophagus</i>             | AY566764 | GU736953 | EU888089  | AY566729 | N/A      | EU888090 | AF113089  | EU888091 | AF112627 |
| <i>Nannacara</i> (Ivanacara)      | N/A      | EF432946 | EF432903  | N/A      | EF432995 | N/A      | N/A       | N/A      | N/A      |
| <i>Nannacara</i> (sensu stricto)  | N/A      | EF432921 | EU888054  | GU736843 | EF432991 | EU888055 | N/A       | EU888056 | N/A      |
| <i>Pterophyllum</i>               | GU737039 | AF370676 | AY662732  | GU736855 | GU736761 | N/A      | AY662856  | AY662933 | AF112603 |
| <i>Retroculus</i>                 | AY566774 | AF370641 | AY662733  | AY566737 | GU736685 | AY662784 | AY662857  | AY662934 | AF112600 |
| <i>Satanoperca</i>                | AY566783 | AB018986 | AY263838  | AY566745 | GU736723 | AY263861 | AY6629351 | AY662935 | N/A      |
| <i>Symphysodon</i>                | GU737041 | AY840119 | EU888112  | GU736857 | GU736763 | EU888113 | AF113069  | N/A      | AF112607 |
| <i>Tahuantinsuyoa</i>             | GU737028 | EF432915 | EU888057  | GU736844 | EF432983 | EU888058 | EU888059  | EU888060 | N/A      |
| <i>Uaru</i>                       | GU737042 | AF370678 | DQ119191  | GU736859 | DQ119278 | DQ119221 | DQ119249  | EU888116 | AF112606 |
